# Supplementary material for: Gender differences and the role of parental education, school types and migration on the body mass index of 2930 Austrian school children
Source: Springer Nature journal article supplement (doi:10.1007/s00508-017-1247-2), 2017-08-22
Supplement: MOESM1 [file 14915138]

**Table S1**

| **Age** |  | **Odds Ratio (CI)** |
| --- | --- | --- |
| **10 years**  **14 years**  **17 years** | EI 1 versus 4  migration  BMI father  male  BMI father  BMI mother  male  BMI mother  BMI father | 3,64 (1,40 – 9,44)  1,85 (1,07 – 3,12)  1,09 (1,01 – 1,18)  1,76 (1,10 – 3,06)  1,78 (1,09 – 1,26)  1,17 (1,01 – 1,25)  3,59 (1,04 – 6,66)  1,12 (1,01 – 1,21)  1,09 (1,00 – 1,19) |
| Table S1: Odds ratios and confidence intervals for all age groups | | |

**Table S2**

|  | **Normal weight** | **Overweight** | **Obesity** |
| --- | --- | --- | --- |
| Boys  Girls  (Mayer et al.)1  Boys  Girls  (HBSC 2014)2  Boys  Girls  (Nutrition report 2012)3  Boys  Girls  (our data) | 77%  85%  81,8%  88,0%  73,9%  78,3%  72,9%  81,4% | 18%  12%  15,2%  9,9%  17,1%  16,2%  19,8%  14,2% | 5,0%  3,0%  3,1%  2,2%  9%  5,5%  7,4%  4,0% |
| Table S2: Overweight and obesity in Austria  1 6-18 years; [27]  2 11-13-17 years [2]  3 7-14 years[3] | | | |
